# Supplementary material for: BAP1 methylation: a prognostic marker of uveal melanoma metastasis
Source: PubMed Central journal article supplement (PMC8484429; doi:10.1038/s41698-021-00226-8), 2021-09-30
Supplement: 41698_2021_226_MOESM1_ESM.pdf [file 41698_2021_226_MOESM1_ESM.pdf]

## Supplementary Information

**Title:** *BAP1* methylation: a prognostic marker of uveal melanoma metastasis

**Supplementary Table 1.** The relationship between *BAP1* mRNA levels and  $\beta$ -methylation values at different CpG loci located within the *BAP1* gene region

| <b>Genomic coordinates (hg38)</b> | <b>Pearson R correlation with <i>BAP1</i> transcript levels</b> | <b>95% confidence interval</b> | <b>P-value</b> |
|-----------------------------------|-----------------------------------------------------------------|--------------------------------|----------------|
| chr3:52,408,017                   | -0.79                                                           | -0.86 to -0.69                 | <0.0001        |
| chr3:52,407,064                   | -0.46                                                           | -0.62 to -0.26                 | <0.0001        |
| chr3:52,411,080                   | -0.45                                                           | -0.61 to -0.25                 | <0.0001        |
| chr3:52,409,960                   | -0.27                                                           | -0.46 to -0.05                 | 0.02           |
| chr3:52,401,282                   | -0.27                                                           | -0.46 to -0.05                 | 0.02           |
| chr3:52,409,954                   | -0.27                                                           | -0.46 to -0.05                 | 0.02           |
| chr3:52,410,817                   | -0.24                                                           | -0.44 to -0.02                 | 0.03           |
| chr3:52,410,601                   | -0.10                                                           | -0.31 to 0.12                  | 0.40           |
| chr3:52,409,408                   | -0.08                                                           | -0.29 to 0.14                  | 0.48           |
| chr3:52,410,749                   | -0.07                                                           | -0.29 to 0.15                  | 0.51           |
| chr3:52,410,043                   | -0.07                                                           | -0.28 to 0.15                  | 0.54           |
| chr3:52,409,686                   | -0.07                                                           | -0.28 to 0.16                  | 0.56           |
| chr3:52,410,698                   | -0.06                                                           | -0.28 to 0.16                  | 0.58           |
| chr3:52,410,616                   | -0.06                                                           | -0.28 to 0.16                  | 0.59           |
| chr3:52,411,210                   | -0.06                                                           | -0.27 to 0.16                  | 0.59           |
| chr3:52,411,223                   | -0.01                                                           | -0.23 to 0.21                  | 0.90           |
| chr3:52,402,340                   | -0.01                                                           | -0.23 to 0.21                  | 0.91           |
| chr3:52,410,694                   | 0.22                                                            | 0.00 to 0.42                   | 0.05           |
| chr3:52,411,087                   | 0.27                                                            | 0.05 to 0.47                   | 0.02           |

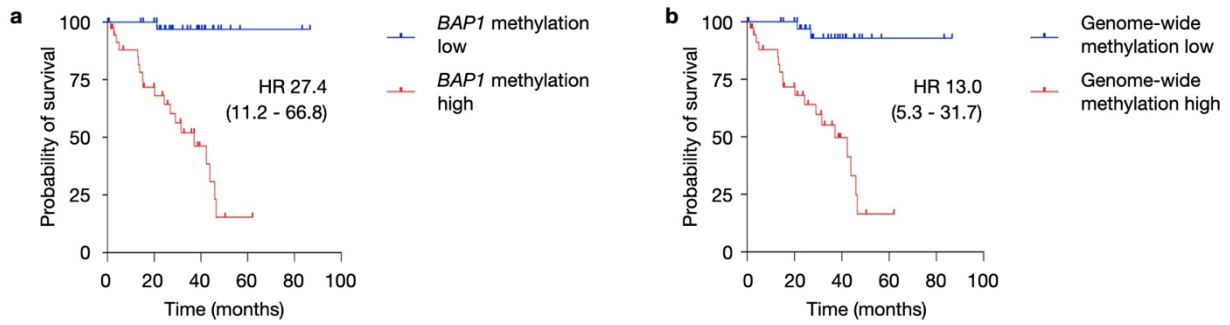

**Supplementary figure 1. Global and *BAP1* methylation levels correlate with worse survival.**

**A)** Probability of survival of (n = 80) TCGA-UM subjects with primary tumors stratified by median *BAP1*  $\beta$ -methylation values or **B)** median  $\beta$ -methylation values obtained from the top 1% differentially methylated loci in monosomy 3 tumors. Statistical significance tested using two-sided log-rank test.
